# Supplementary material for: Transcriptome Analysis of Clavibacter Michiganensis Subsp. Michiganensis-Infected Tomatoes: A Role Of Salicylic Acid In The Host Response
Source: Research Square preprint supplement (doi:10.21203/rs.3.rs-593787/v1), 2021-06-23
Supplement: Supplementary file 1 [file 9aa841be0e69234d6fa79185.xlsx]

## Sheet: Table 1
Table 1. Up-regulated DEGs encoding RGAs and TFs
familya	Group	number	gene symbolb
RLK	Total	122
	DUF26	10
	10L2	8
	LRR	38	SlSERK3A, SlSERK3B, TFT1/TARK1
	LysM	3	SlLYK1/Bti9, SlLYK4, SlLYK9
	SD1a	14
	SD2b	10
	WAK	2
	WAK/LRK10L1	8
	LEC	3
	RLCK	20	ACIK1
	other	6	SOBIR1/EVR, FER4, FER10, LESK1
NBS		24
RLP		25
TM-CC		15
WRKY	Total	22
	Group I	3	SlWRKY4, SlWRKY31, SlWRKY33
	Group II-a	3	SlWRKY39, SlWRKY45, SlWRKY46
	Group II-b	3	SlWRKY6, SlWRKY16, SlWRKY17
	Group II-c	4	SlWRKY23, SlWRKY51, SlWRKY55, SlWRKY75
	Group II-d	1	SlWRKY8
	Group III	8	SlWRKY41, SlWRKY42, SlWRKY53, SlWRKY54, SlWRKY58, SlWRKY59, SlWRKY80, SlWRKY81
NAC	Total	14
	Group I	4	SlNACMTF3, SlNACMTF12
	Group II	3	SlNACMTF8
	Group III	2	SlNAC1, SlNAC2
	Group VI	2	SlNACMTF11
	other	3	SlJUB
HSF		5	SlHsfA4b, SlHsfA4c, SlHsfB1, SlHsfB2b, SlHsfB3a
CBP60		5
aGene family significantly enriched in up-regulated DEG by hypergeometric distribution test (p-value < 0.05)
bGenes whose symbols have been reported
